# Supplementary material for: Numerical Simulation Approaches for Vertical-Axis Wind Turbines: Investigating Airfoil Design and Predictive Techniques
Source: Preprints.org preprint supplement (doi:10.20944/preprints202401.1088.v1), 2024-01-15
Supplement: Supplementary file 1 [file supplementary]

**Numerical Simulation Approaches for Vertical-Axis Wind Turbines: Investigating Airfoil Design and Predictive Techniques**

Adesiyan A.1*, Akinnawo O. O2

1Dundalk Institute of Technology, Ireland

2School of Physics, Universiti Sains, Malaysia, 11800 Minden Penang, Malaysia

2Department of Physics and Earth Sciences, Crawford University, Nigeria

SUPPLEMENTARY MATERIALS

A. MATLAB Code

Below is the MATLAB code for the computational analysis of the obtained values from the solver exported to a CSV file.

% First do the housekeeping

clear % Clears all variables from the current workspace

clc % Clears all texts from the command window

close all % Closes any open windows

c = 100 % Assumed Length of chord of the airfoil in m

rho = 1.225 % Density of air in kg/m^3

% Importing NACA 4412 data %

Airfoil_data = xlsread ('Airfoil_data.csv'); %Reads the CSV file

AOA = Airfoil_data (:,1); % Angle of attack in degrees

L_V5 = Airfoil_data (:,5); % Lift force for velocity = 10 m/s

L_V10 = Airfoil_data (:,8); % Lift force for velocity = 15 m/s

L_V16 = Airfoil_data (:,11); % Lift force for velocity = 20 m/s

D_V5 = Airfoil_data (:,4); % Drag force for velocity = 10 m/s

D_V10 = Airfoil_data (:,7); % Drag force for velocity = 15 m/s

D_V16 = Airfoil_data (:,10); % Drag force for velocity = 20 m/s

LD_V5 = Airfoil_data (:,6); % Lift-Drag coeffi for velocity = 10 m/s

LD_V10 = Airfoil_data (:,9); % Lift-Drag coeffi for velocity = 15 m/s

LD_V16 = Airfoil_data (:,12); % Lift-Drag coeffi for velocity = 20 m/s

%% Plotting the various components of the Imported data

figure()

hold on

grid on

plot(AOA,L_V5, AOA,L_V10, AOA,L_V16);

xlabel('Angle of attack, degrees')

ylabel('Lift, N')

legend('Velocity = 5 m/s', 'Velocity = 10 m/s', 'Velocity = 16 m/s')

title('A graph of Lift force against angle of attack')

figure()

hold on

grid on

plot(AOA,D_V5, AOA,D_V10, AOA,D_V16);

xlabel('Angle of attack, degrees')

ylabel('Drag, N')

legend('Velocity = 5 m/s', 'Velocity = 10 m/s', 'Velocity = 16 m/s')

title('A graph of Drag force against angle of attack')

xlim ([-6 14])

ylim ([0 0.5])

figure()

hold on

grid on

plot(AOA,LD_V5, AOA,LD_V10, AOA,LD_V16);

xlabel('Angle of attack, degrees')

ylabel('Lift-Drag coefficient')

legend('Velocity = 5 m/s', 'Velocity = 10 m/s', 'Velocity = 16 m/s')

title('A graph of Lift-Drag coefficient against angle of attack')

%% Obtaining optimum AOA value based on L/D ratio

[pksA,index] = findpeaks(LD_V5); %Obtains the peak value of lift-drag at velocity 5m/s

AOA_Optimum_V5 = AOA(index); %Returns the index value as the AOA optimum

[pksB,index] = findpeaks(LD_V10); %Obtains the peak value of lift-drag at velocity 10m/s

AOA_Optimum_V10 = AOA(index); %Returns the index value as the AOA optimum

[pksC,index] = findpeaks(LD_V16); %Obtains the peak value of lift-drag at velocity 16m/s

AOA_Optimum_V16 = AOA(index); %Returns the index value as the AOA optimum.

1. **Supplementary data**

Table S1. Showing forces acting on the Airfoil.

| **S/N** | **Lift (N)** | **Lift (N)** | **Lift (N)** | **Drag (N)** | **Drag (N)** | **Drag (N)** | **LD ratio** | **LD ratio** | **LD ratio** |
| --- | --- | --- | --- | --- | --- | --- | --- | --- | --- |
| **AOA** | **5 (m/s)** | **10 (m/s)** | **16 (m/s)** | **5 (m/s)** | **10 (m/s)** | **16 (m/s)** | **5 (m/s)** | **10 (m/s)** | **16 (m/s)** |
| 0 | 0.0542 | 0.2270 | 0.5949 | 0.0028 | 0.0101 | 0.0245 | 19.5901 | 22.5355 | 24.2600 |
| -5 | -0.0146 | -0.0527 | -0.1271 | 0.0012 | 0.0039 | 0.0090 | -12.5082 | -13.6819 | -14.2003 |
| -3 | 0.0128 | 0.0587 | 0.1607 | 0.0030 | 0.0111 | 0.0276 | 4.3016 | 5.2684 | 5.8200 |
| -1 | 0.0404 | 0.1709 | 0.4504 | 0.0032 | 0.0120 | 0.0297 | 12.5041 | 14.1877 | 15.1481 |
| 1 | 0.0680 | 0.2829 | 0.7389 | 0.0019 | 0.0065 | 0.0151 | 35.6857 | 43.6879 | 48.8993 |
| 3 | 0.0951 | 0.3932 | 1.0238 | 0.0010 | 0.0056 | 0.0162 | 93.6362 | 70.4933 | 63.0636 |
| 7 | 0.1465 | 0.6030 | 1.5672 | 0.0114 | 0.0482 | 0.1269 | 12.8875 | 12.5154 | 12.3497 |
| 10 | 0.1806 | 0.7440 | 1.9346 | 0.0225 | 0.0942 | 0.2470 | 8.0373 | 7.8950 | 7.8327 |
| 12 | 0.1990 | 0.8234 | 2.1452 | 0.0307 | 0.1294 | 0.3394 | 6.4761 | 6.3643 | 6.3201 |
